# Supplementary material for: Thermocatalytic Performance of LaCo1−xNixO3−δ Perovskites in the Degradation of Rhodamine B
Source: MDPI journal article supplement (doi:10.3390/catal13020325), 2023-02-01
Supplement: s1 [file catalysts-2181064-supplementary.pdf › catalysts-2181064-supplementary.pdf]

# Thermocatalytic Performance of $\text{LaCo}_{1-x}\text{Ni}_x\text{O}_{3-\delta}$ Perovskites in the Degradation of Rhodamine B

Benjamin H. Christensen <sup>1</sup>, Francesca Deganello <sup>2</sup>, Valeria La Parola <sup>2</sup>, Mads K. Jørgensen <sup>1</sup>, Vittorio Boffa <sup>1</sup> and Martin B. Østergaard <sup>1,\*</sup>

<sup>1</sup> Center for Membrane Technology, Department of Chemistry and Bioscience, Aalborg University, DK-9220 Aalborg East, Denmark  
<sup>2</sup> Istituto per lo Studio dei Materiali Nanostrutturati, Consiglio Nazionale delle Ricerche (CNR-ISMN), Via Ugo La Malfa 153, 90146 Palermo, Italy  
\* Correspondence: mbo@bio.aau.dk

## Supporting Information

**Table S1.** Crystal space group, lattice parameters, crystal size, density, and fitting parameters from Rietveld refinement for all synthesized perovskites.

|                           | $\text{LaCoO}_{3-\delta}$ | $\text{LaCo}_{0.8}\text{Ni}_{0.2}\text{O}_{3-\delta}$ | $\text{LaCo}_{0.6}\text{Ni}_{0.4}\text{O}_{3-\delta}$ | $\text{LaCo}_{0.4}\text{Ni}_{0.6}\text{O}_{3-\delta}$ | $\text{LaCo}_{0.2}\text{Ni}_{0.8}\text{O}_{3-\delta}$ |
|---------------------------|---------------------------|-------------------------------------------------------|-------------------------------------------------------|-------------------------------------------------------|-------------------------------------------------------|
| Space group               | $R\bar{3}c$ (167)         | $R\bar{3}c$ (167)                                     | $R\bar{3}c$ (167)                                     | $R\bar{3}c$ (167)                                     | $R\bar{3}c$ (167)                                     |
| Volume [ $\text{\AA}^3$ ] | 335.736±0.009             | 337.974±0.007                                         | 339.228±0.007                                         | 339.516±0.016                                         | 339.651±0.009                                         |
| a,b [ $\text{\AA}$ ]      | 5.4420±0.0001             | 5.4560±0.0001                                         | 5.4633±0.0001                                         | 5.4618±0.0002                                         | 5.4646±0.0001                                         |
| c [ $\text{\AA}$ ]        | 13.0902±0.0002            | 13.1099±0.0001                                        | 13.1236±0.0001                                        | 13.1418±0.0003                                        | 13.1336±0.0002                                        |
| Crystal size [nm]         | 290                       | 250                                                   | 238                                                   | 160                                                   | 153                                                   |
| microstrain               | 885                       | 950                                                   | 1148                                                  | 2334                                                  | 1284                                                  |
| $R_w$                     | 3.39                      | 3.397                                                 | 3.33                                                  | 5.25                                                  | 3.79                                                  |
| GOF                       | 1.00                      | 1.00                                                  | 0.93                                                  | 1.28                                                  | 1.01                                                  |

**Table S2.** Atomic positions and thermal parameters of  $\text{LaCoO}_{3-\delta}$  and  $\text{LaCo}_{0.2}\text{Ni}_{0.8}\text{O}_{3-\delta}$  from Rietveld refinements. Differences compared to that in the ICDD database is shown in brackets.

| Composition                                           | Element | x               | y       | z       | $U_{\text{iso}}$ |
|-------------------------------------------------------|---------|-----------------|---------|---------|------------------|
| $\text{LaCoO}_{3-\delta}$                             | La      | 0.00000         | 0.00000 | 0.25000 | 0.00677          |
|                                                       | Co      | 0.00000         | 0.00000 | 0.00000 | 0.00414          |
|                                                       | O       | 0.44701 (0.444) | 0.00000 | 0.75000 | 0.00124          |
| $\text{LaCo}_{0.2}\text{Ni}_{0.8}\text{O}_{3-\delta}$ | La      | 0.00000         | 0.00000 | 0.25000 | 0.01000          |

|    |                   |         |         |         |
|----|-------------------|---------|---------|---------|
| Co | 0.00000           | 0.00000 | 0.00000 | 0.01000 |
| Ni | 0.00000           | 0.00000 | 0.00000 | 0.01000 |
| O  | 0.53876 (0.54946) | 0.00000 | 0.25000 | 0.02813 |

**Table S3.** Amounts of chemicals used for synthesizing of each perovskite composition.

| Composition                                           | $\text{La}(\text{NO}_3)_3 \cdot 6\text{H}_2\text{O}$<br>[g] | $\text{Co}(\text{NO}_3)_2 \cdot 6\text{H}_2\text{O}$<br>[g] | $\text{Ni}(\text{NO}_3)_2 \cdot 6\text{H}_2\text{O}$<br>[g] | $\text{C}_6\text{H}_8\text{O}_7$<br>[g] | $\text{NH}_4\text{NO}_3$<br>[g] |
|-------------------------------------------------------|-------------------------------------------------------------|-------------------------------------------------------------|-------------------------------------------------------------|-----------------------------------------|---------------------------------|
| $\text{LaCoO}_{3-\delta}$                             | 4.330                                                       | 2.910                                                       | -                                                           | 7.685                                   | 9.205                           |
| $\text{LaCo}_{0.8}\text{Ni}_{0.2}\text{O}_{3-\delta}$ | 4.330                                                       | 2.328                                                       | 0.582                                                       | 7.685                                   | 9.205                           |
| $\text{LaCo}_{0.6}\text{Ni}_{0.4}\text{O}_{3-\delta}$ | 4.330                                                       | 1.746                                                       | 1.163                                                       | 7.685                                   | 9.205                           |
| $\text{LaCo}_{0.4}\text{Ni}_{0.6}\text{O}_{3-\delta}$ | 4.330                                                       | 1.164                                                       | 1.745                                                       | 7.685                                   | 9.205                           |
| $\text{LaCo}_{0.2}\text{Ni}_{0.8}\text{O}_{3-\delta}$ | 4.330                                                       | 0.582                                                       | 2.326                                                       | 7.685                                   | 9.205                           |

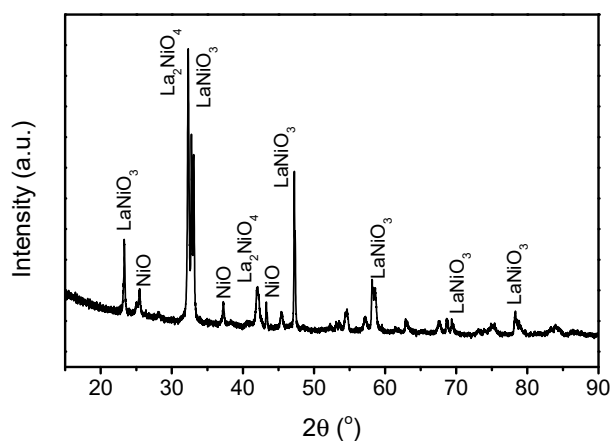

**Figure S1.** X-ray diffractogram of synthesized  $\text{LaNiO}_3$  containing impurities.

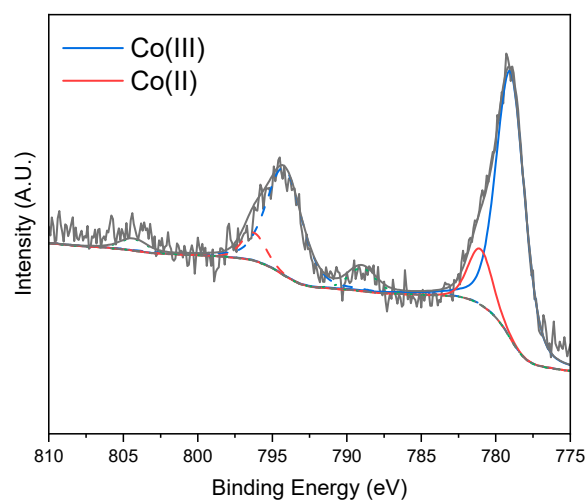

**Figure S2.** Fitted Co 2p region of  $\text{LaCoO}_{3-\delta}$ . Bold line Co 2p 3/2, dashed line Co 2p 1/2; green dotted line Co satellites.

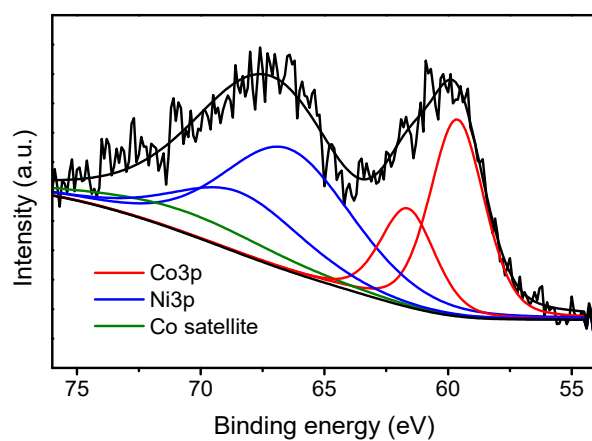

**Figure S3.** Fitted Co 2p, Ni 2p XPS region of  $\text{LaCo}_{0.6}\text{Ni}_{0.4}\text{O}_{3-\delta}$ .

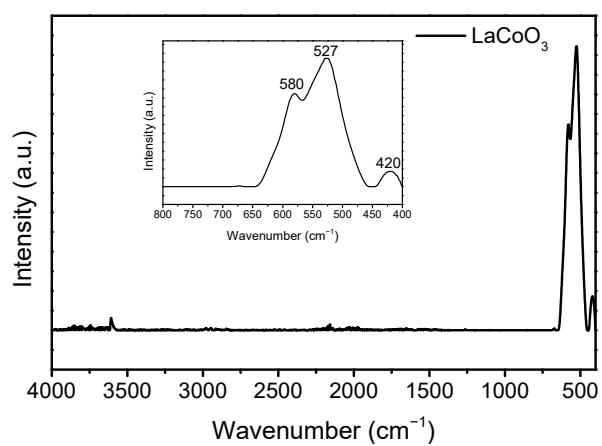

**Figure S4.** ATR-FTIR of  $\text{LaCoO}_{3-\delta}$ . Inset shows a zoom of the main signals.

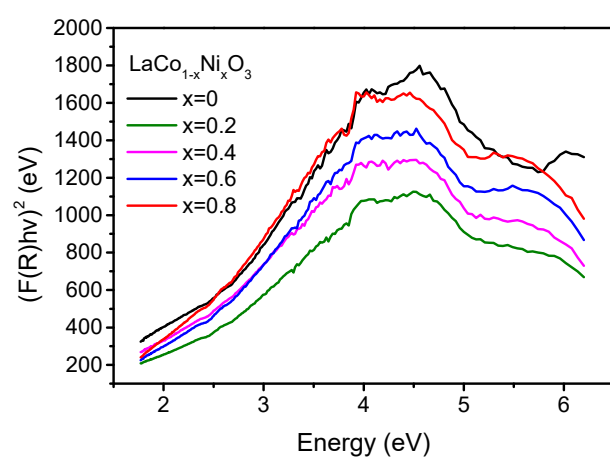

**Figure S5.** Kubelka-Munk plots for determination of the energy band gap.

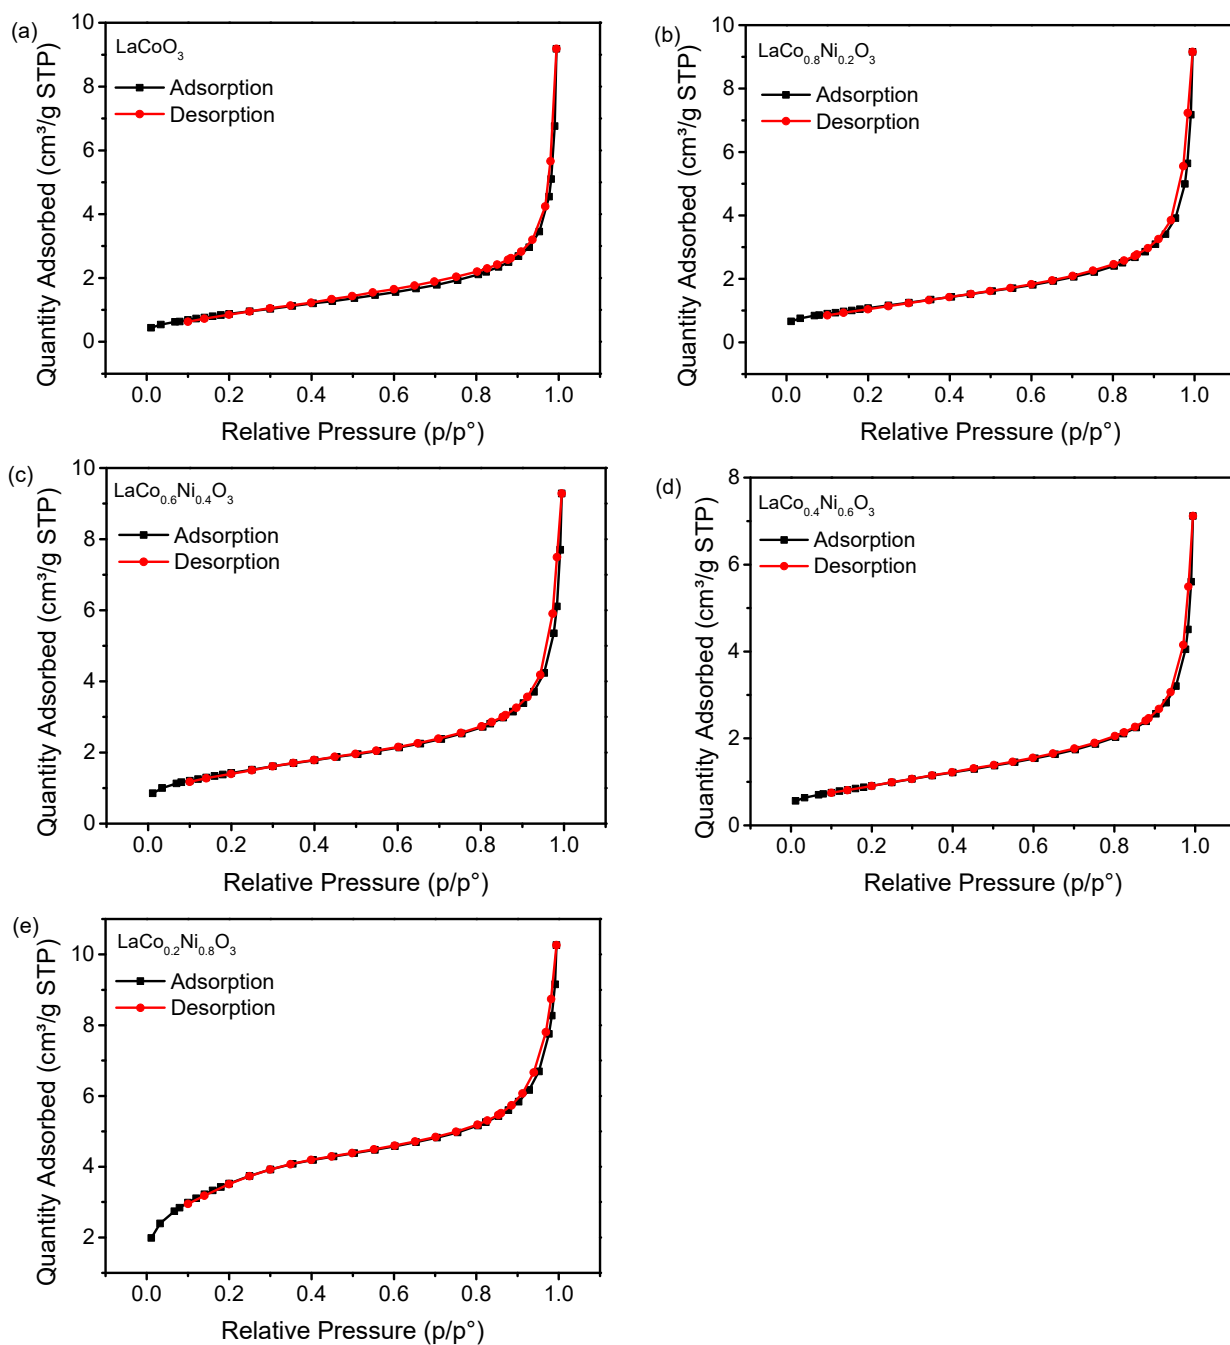

**Figure S6.**  $\text{N}_2$  adsorption and desorption isotherms for the synthesized perovskites (a)  $\text{LaCoO}_{3-\delta}$ , (b)  $\text{LaCo}_{0.8}\text{Ni}_{0.2}\text{O}_{3-\delta}$ , (c)  $\text{LaCo}_{0.6}\text{Ni}_{0.4}\text{O}_{3-\delta}$ , (d)  $\text{LaCo}_{0.4}\text{Ni}_{0.6}\text{O}_{3-\delta}$ , and (e)  $\text{LaCo}_{0.2}\text{Ni}_{0.8}\text{O}_{3-\delta}$ .

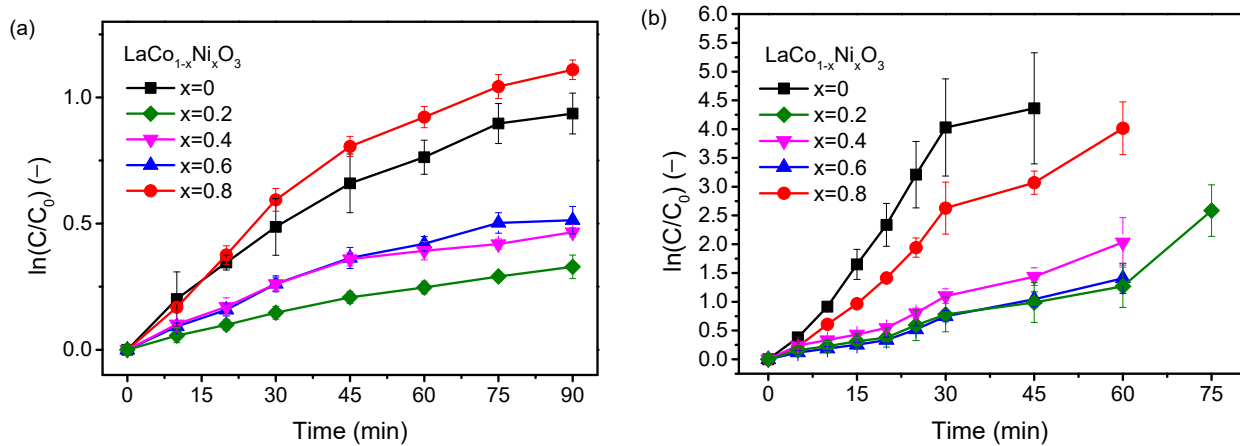

**Figure S7.** Degradation of rhodamine B at perovskite concentrations of (a)  $100 \text{ mg L}^{-1}$  and (b)  $500 \text{ mg L}^{-1}$ .

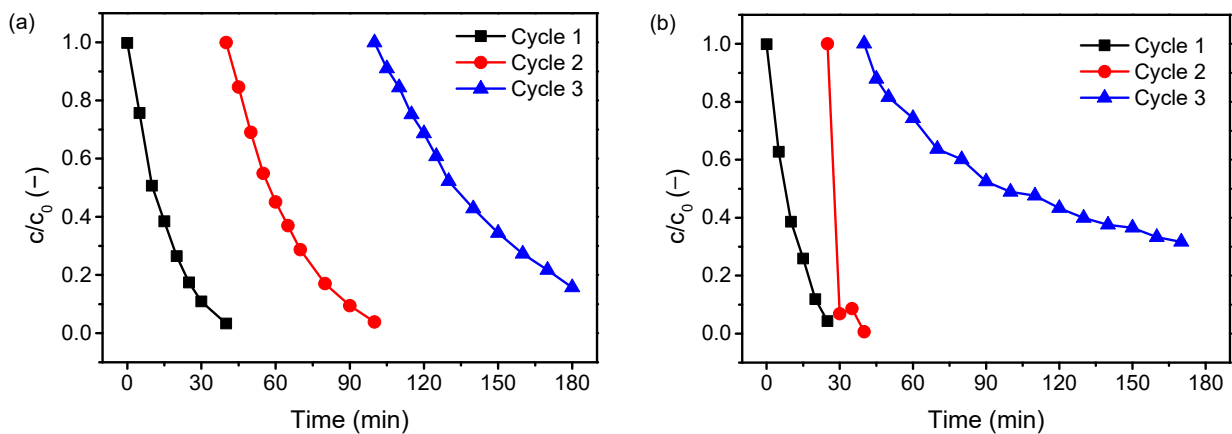

**Figure S8.** Stability of (a)  $\text{LaCoO}_{3-\delta}$  and (b)  $\text{LaCo}_{0.2}\text{Ni}_{0.8}\text{O}_{3-\delta}$  during 3 cycles of catalytic degradation of rhodamine B at  $25^\circ\text{C}$ .

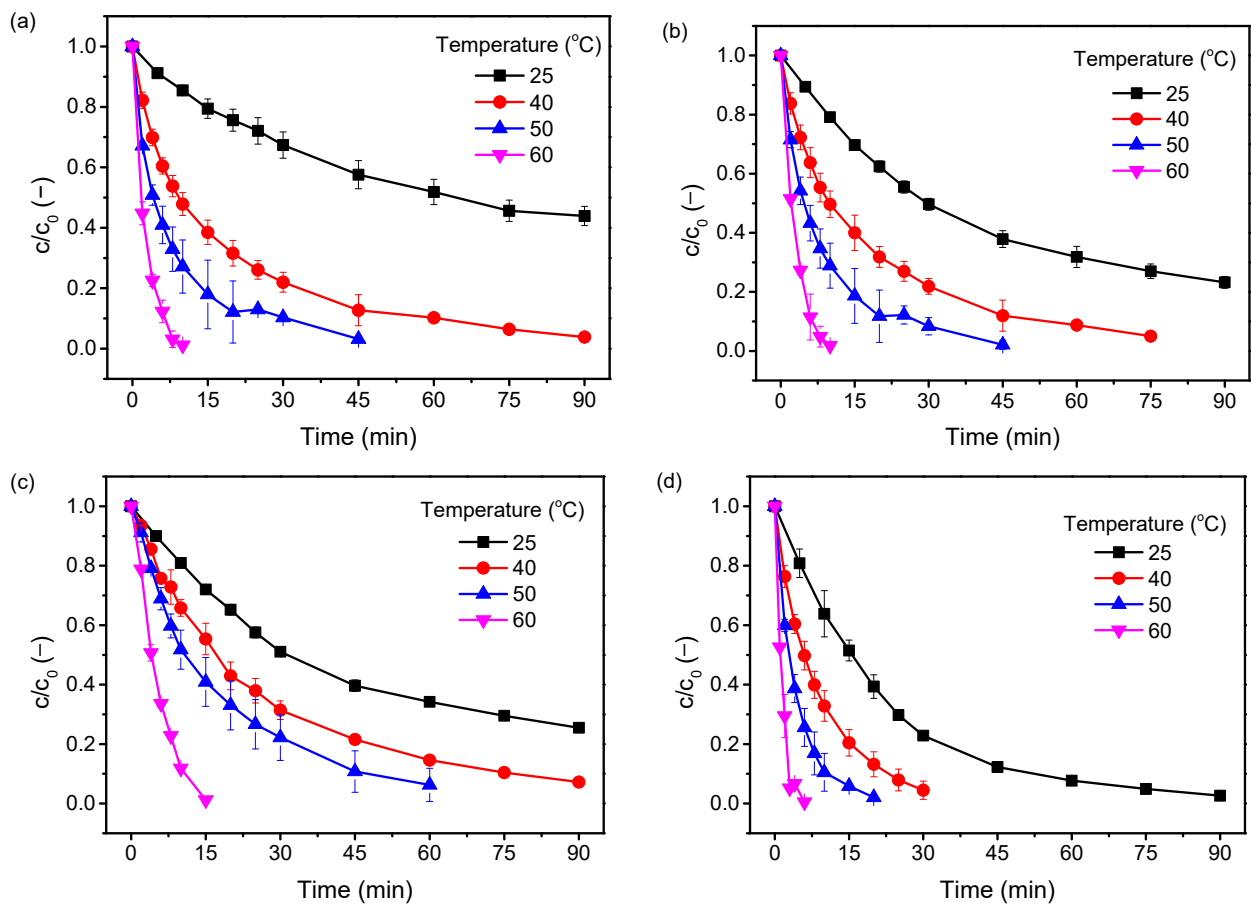

**Figure S9.** Temperature effect on catalytic activity for (a)  $\text{LaCo}_{0.8}\text{Ni}_{0.2}\text{O}_{3-\delta}$ , (b)  $\text{LaCo}_{0.6}\text{Ni}_{0.4}\text{O}_{3-\delta}$ , (c)  $\text{LaCo}_{0.4}\text{Ni}_{0.6}\text{O}_{3-\delta}$ , and (d)  $\text{LaCo}_{0.2}\text{Ni}_{0.8}\text{O}_{3-\delta}$ .
